# Supplementary material
Source: PubMed Central journal article supplement (PMC3341549)
Supplement: mmc1.pdf [file mmc1.pdf]

# **On the Mechanism of Gating Charge Movement of CIC-5, a Human $\text{Cl}^-/\text{H}^+$ Antiporter**

Giovanni Zifarelli, Silvia De Stefano, Ilaria Zanardi, and Michael Pusch

Istituto di Biofisica, The National Research Council, Genoa, Italy

Supplementary Material

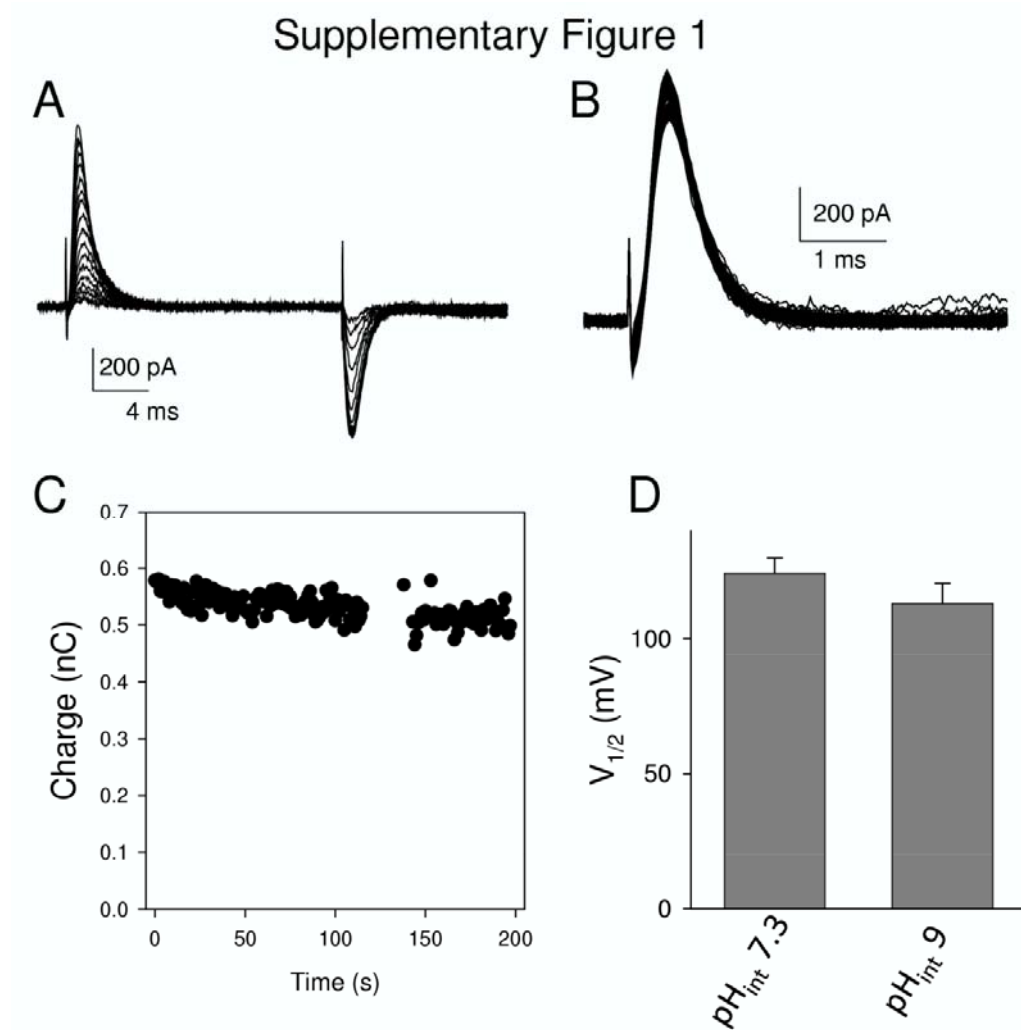

**Figure S1.** Intracellular protons are not needed for transient currents of E268A. Panel **A** shows currents from a transfected HEK cell evoked by voltage-steps ranging from 200 to 60 mV in -20 mV steps. The internal pH was 9 in this recording. In **B** the successive response to pulses to 200 mV are overlaid. Pulses were applied approximately once per second. Currents are from the same cell as in panel A (currents in A were acquired after these repetitive pulses). The first pulse was obtained a few seconds after the establishment of the whole cell configuration. In **C** the integral of the traces shown in B is plotted as a function of time. Note the stability of the currents despite the perfusion of the cell with a solution of pH 9. Similar results were obtained with two other cells at pH 9 and also two cells at pH 10, however, seals became unstable at pH 10 after around 30 secs. In **D** are plotted the average values of the voltage of half maximal activation obtained from Boltzmann fits to the  $Q(V)$  relationships.

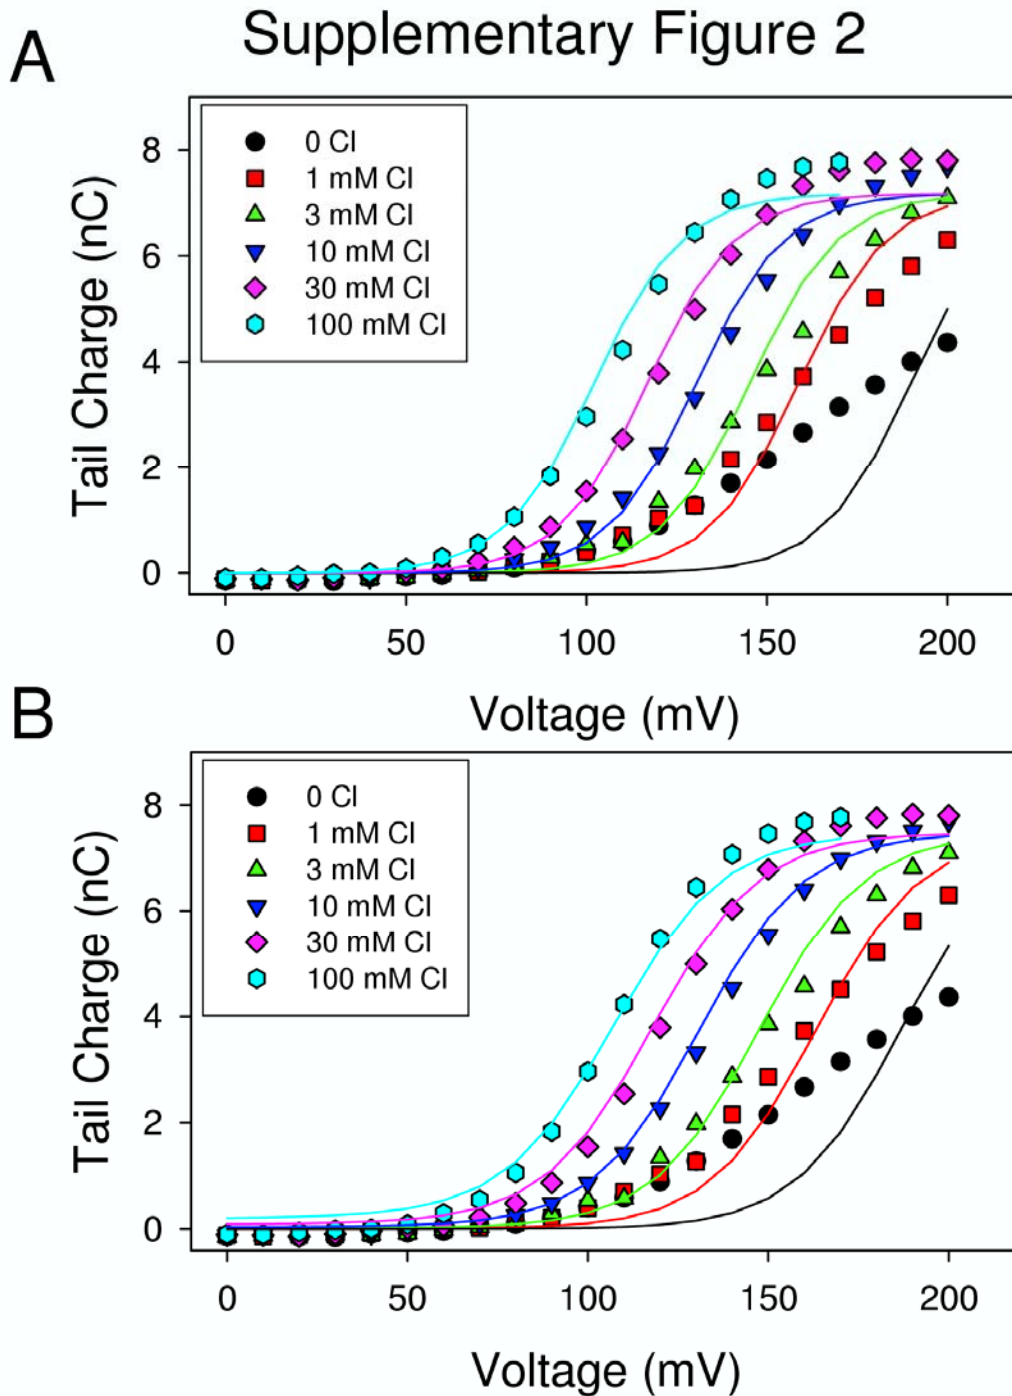

**Figure S2.** Models (I) and (II) fail to account for the Cl<sup>-</sup> dependence of the transient currents.

The data points of Fig. 2E are shown superimposed with a fit of predictions of Model (I) (A) and Model (II) (B), respectively. In Model (I) state *U* represents the unbound transporter and state *B* the transporter in which Cl<sup>-</sup> is bound with a voltage dependent dissociation constant  $K_D(V) = k_{off}/k_{on} = K_D(0) \exp(-z_K \phi)$ , where  $\phi = V F / (RT)$ . Model (I) predicts a  $Q(V)$  relationship of the form

$$Q(V) = \frac{Q_{max}}{1 + \frac{K_D(0)e^{-z_K\phi}}{[Cl]}}$$

Lines in panel **A** represent the best fit of this equation to the data points.

For Model (II) the charge voltage-relationship can be calculated by  $Q(V) \sim z_K p(B) + (z_K + z_C) p(B^*)$ , where  $p(B)$  is the probability to be in state  $B$  and  $p(B^*)$  is the probability to be in state  $B^*$ . Thus, standard equilibrium analysis yields

$$Q(V) = Q_{max} \frac{1 + \frac{z_K}{z_K + z_C} r_0 e^{-z_C\phi}}{1 + r_0 e^{-z_C\phi} + \frac{K_D(0)r_0 e^{-(z_C + z_K)\phi}}{[Cl]}}$$

where  $r_0 = \beta_0/\alpha_0$ . Panel **B** shows the data points of Fig. 3E superimposed with a fit this equation. For the “0 Cl” data a contaminating concentration of 80  $\mu\text{M}$  was assumed (see Fig. S3).

### Supplementary Figure 3

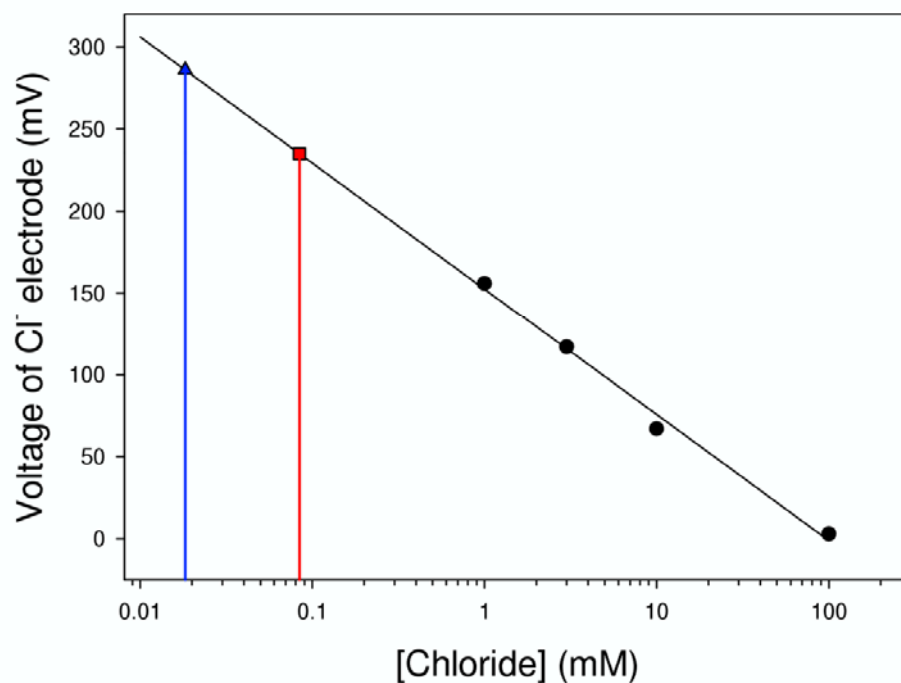

**Figure S3.** Residual Cl<sup>-</sup> concentration at nominal zero chloride. Due to ubiquitous contamination, it is practically impossible to achieve a Cl<sup>-</sup> concentration below the micromolar range. In order to estimate the residual Cl<sup>-</sup> concentration in our nominal zero Cl<sup>-</sup> solution, we employed a chloride-sensitive microelectrode, and measured its response to our experimental solutions. Pipettes were prepared from silanized voltage-clamp pipettes, whose tip was filled with chloride ionophore I (*meso*-Tetraphenylporphyrin manganese(III)-chloride complex) (Sigma, Milan, Italy). Pipettes were backfilled with a buffered saline and connected to a custom high impedance amplifier. A 3 M KCl filled microelectrode served as reference. For [Cl<sup>-</sup>]<sub>ext</sub> ≥ 1 mM, the response was logarithmic with a slope of ~ 70 mV / decade. From the response to the nominal zero Cl<sup>-</sup> solution (red square), a residual contamination of ~ 80 μM was estimated (red dashed line). Even though this value is probably an overestimation, it indicates that the residual [Cl<sup>-</sup>]<sub>ext</sub> is not negligible. Addition of 1 mM AgSO<sub>4</sub> to the nominal zero Cl<sup>-</sup> solution (blue triangle) further reduced the apparent level of Cl<sup>-</sup> to around 20 μM (blue dashed line). Unfortunately, AgSO<sub>4</sub> could not be used to reduce the free Cl<sup>-</sup> concentration in the experiments with oocytes (or transfected cells) because even μM concentrations of Ag<sup>+</sup> induced large leak currents. In conclusion, we considered the residual Cl<sup>-</sup> concentration to be of the order of 20-80 μM.

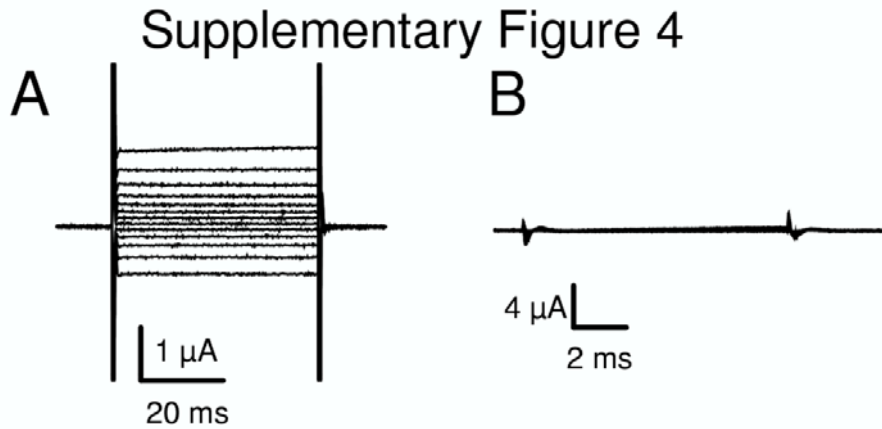

**Figure S4.** No transient currents are seen for mutant E211C/E268A. Panel **A** shows typical steady state  $\text{Cl}^-$  currents mediated by the E211C/E268A mutant expressed in a *Xenopus* oocyte and evoked by a pulse protocol with steps ranging from 120 mV to -20 mV. The phenotype is very similar to that of the E211A mutant. Panel **B** shows voltage clamp traces measured from the same oocyte using the same pulse protocol as used in Fig. 1 at 0 mM  $[\text{Cl}^-]_{\text{ext}}$ . No transient currents larger than those seen on non-injected oocytes could be observed. Very similar results were obtained in  $n > 4$  oocytes.

## Supplementary Figure 5

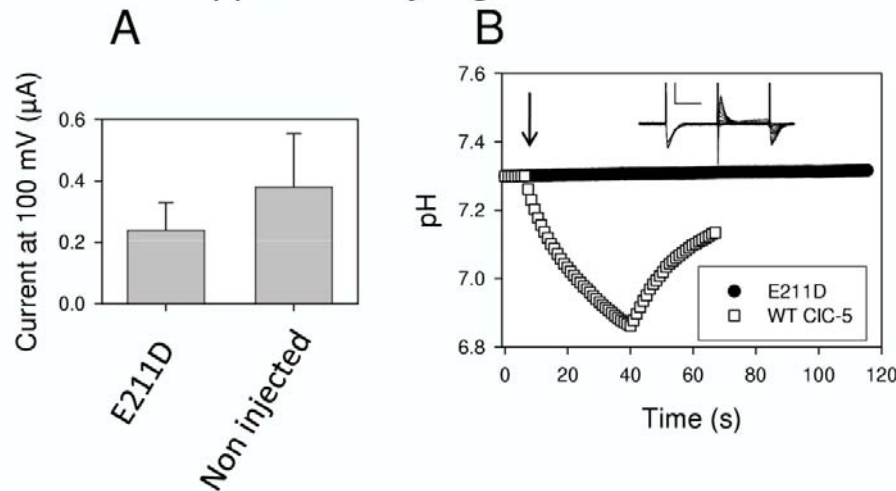

**Figure S5.** Mutant E211D does not show steady state transport above the level of non-injected oocytes. Panel A shows average steady state currents at 100 mV measured in a batch of oocytes injected with E211D or not injected. No currents above the level of non-injected oocytes are seen. In panel B example recordings of the extracellular pH close to the oocyte surface are shown for an E211D expressing oocyte (transient currents are shown in the inset; scale bars: 2  $\mu\text{A}$ , 2 ms) and a WT CIC-5 expressing oocyte. At the time indicated by the arrow 200 ms pulses to 100 mV at 1 sec intervals were applied and led to an immediate acidification in the case of WT but not for E211D. No acidification was seen in all E211D tested oocytes (n=4).

## Supplementary Figure 6

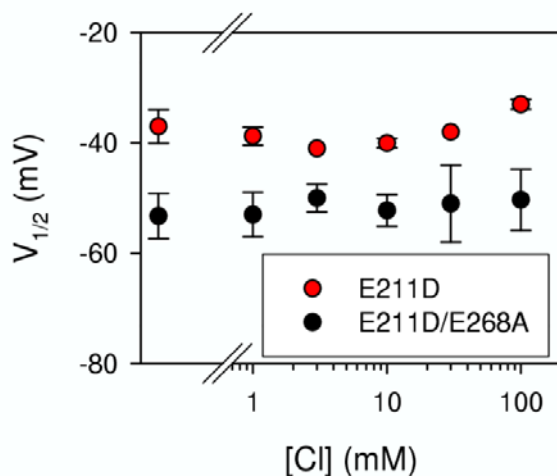

**Figure S6.** Transient currents of mutant E211D and E211D/E268A at  $\text{pH}_{\text{ext}}$  7.3. Average values of  $V_{1/2}$  as a function of  $[\text{Cl}]_{\text{ext}}$  obtained by fitting the Q(V) relationship obtained for the mutants expressed in *Xenopus* oocytes with Eq. (1). Error bars indicate SEM (n $\geq$ 3).

Supplementary Figure 7  
WT CIC-5

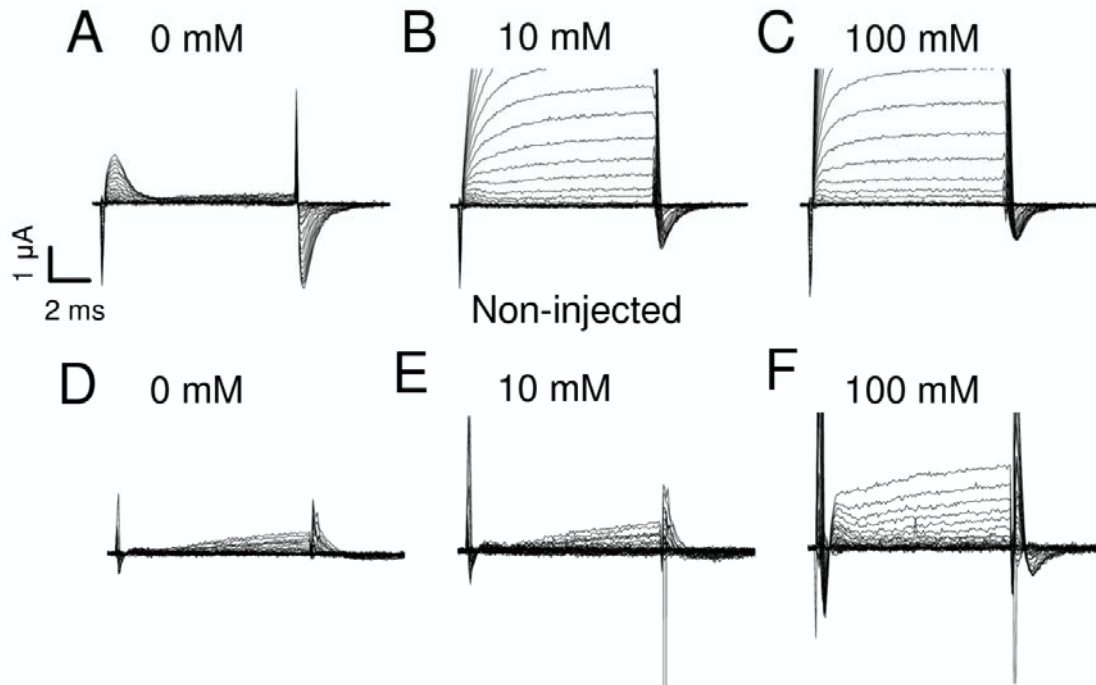

**Figure S7.** Comparison of transient currents seen for WT CIC-5 (upper traces) and non-injected oocytes (lower traces) at the indicated  $[Cl^-]_{ext}$ .
